# Supplementary material
Source: Research Square preprint supplement (doi:10.21203/rs.3.rs-9229990/v1)
Supplement: Supplementary file 1 [file 82f2d91fbca3bdd47e141d4c.docx]

**Quantifying Urban–Rural Disparities in Caesarean Section Deliveries in India: A Multilevel and Fairlie Decomposition Approach**

**Supplementary table**

**Table S1: Clustering of C-section delivery at state, district and PSU level in India 2019-21.**

| Level Description | Urban | | Rural | | Overall | |
| --- | --- | --- | --- | --- | --- | --- |
| ICC (Model 1) | IIC (Model 2) | ICC (Model 1) | IIC (Model 2) | ICC (Model 1) | IIC (Model 2) |
| State | 0.10 | 0.07 | 0.17 | 0.07 | 0.15 | 0.07 |
| District | 0.14 | 0.09 | 0.23 | 0.11 | 0.21 | 0.10 |
| PSU | 0.22 | 0.14 | 0.30 | 0.17 | 0.30 | 0.16 |
